# Supplementary material for: Single-fly assemblies fill major phylogenomic gaps across the Drosophilidae Tree of Life
Source: PubMed Central journal article supplement — bioRxiv. 2023 Oct 2:2023.10.02.560517. Preprint. [Version 1] doi: 10.1101/2023.10.02.560517 (PMC10592941; doi:10.1101/2023.10.02.560517), 2023-10-02

## Supplementary Figures

**Figure S1.** Multi-locus species tree of 360 drosophilid and 4 outgroup taxa estimated from 1,000 single-copy orthologs (Methods). Branch lengths are scaled by the substitution rate at 4-fold degenerate sites. Node values are posterior probabilities computed by ASTRAL.

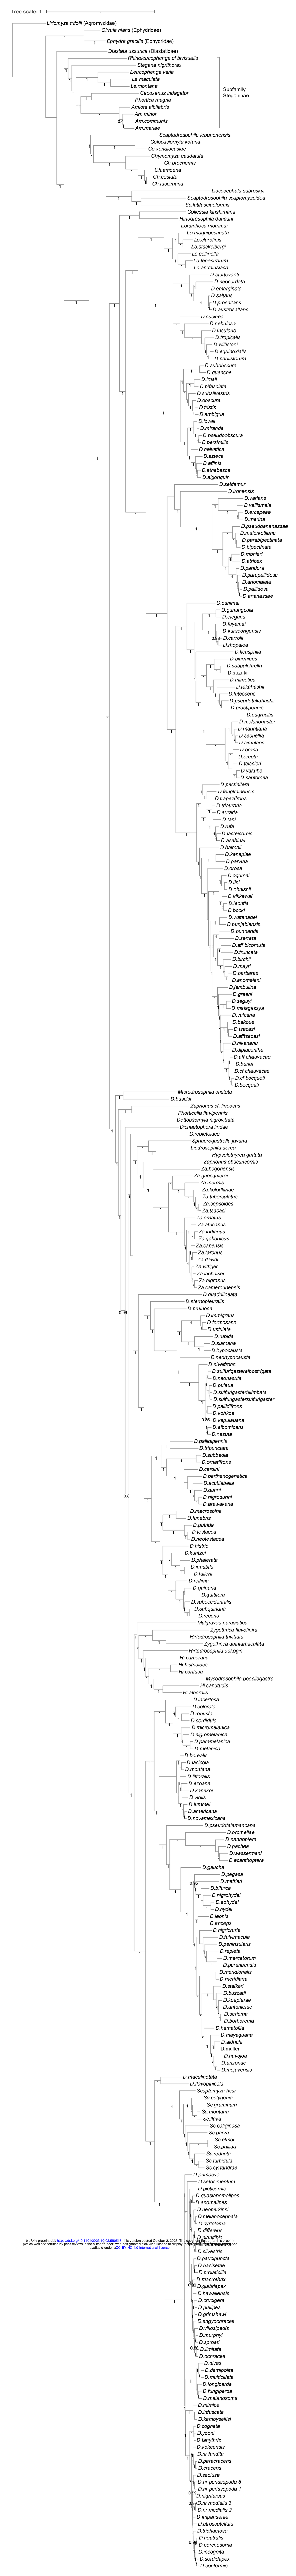

Supplement: NIHPP-2023.10.02.560517V1-supplement-2.pdf [file NIHPP-2023.10.02.560517V1-supplement-2.pdf]
